# Supplementary material for: Typing Clostridium difficile strains based on tandem repeat sequences
Source: Springer Nature journal article supplement (doi:10.1186/1471-2180-9-6), 2009-01-08
Supplement: Additional file 2 [file 1471-2180-9-6-s2.pdf]

**Additional file 2.** TRST types and associated repeat profiles.

| <b>TRST type</b> | <b>TR6 repeat succession</b>                                                                                                                                                             | <b>TR10 repeat succession</b>                                                                                                     |
|------------------|------------------------------------------------------------------------------------------------------------------------------------------------------------------------------------------|-----------------------------------------------------------------------------------------------------------------------------------|
| tr-001           | R044-R011-R051-R007-R023-R024-R052-R053-R004-R019-R018-R019-R018-R022-R035                                                                                                               | N003-N002-N004-N005-N004-N006-N004-N006-N004-N007-N004-N008-N009-N010-N004-N005-N004-N011                                         |
| tr-002           | R044-R011-R051-R007-R020-R007-R015-R008-R009-R022-R035                                                                                                                                   | N003-N002-N004-N008-N009-N005-N004-N014-N015-N011                                                                                 |
| tr-003           | R044-R011-R051-R007-R020-R021-R030-R007-R015-R008-R009-R022-R035                                                                                                                         | N003-N008-N004-N005-N004-N008-N004-N008-N009-N005-N009-N005-N009-N010-N004-N005-N004-N011                                         |
| tr-004           | R007-R003-R019-R018-R019-R018-R019-R018-R019-R018-R077-R018-R019-R018-R008-R028-R078-R028-R038-R079-R022-R080                                                                            | N016-N017-N018-N035-N004-N005-N004-N005-N004-N002-N004-N002-N004-N005-N029-N038-N037-N018-N011                                    |
| tr-005           | R044-R011-R051-R007-R023-R024-R052-R053-R004-R019-R018-R019-R018-R022-R035                                                                                                               | N003-N002-N004-N005-N004-N006-N004-N008-N004-N008-N004-N008-N004-N008-N004-N008-N004-N006-N004-N005-N009-N005-N004-N014-N015-N011 |
| tr-006           | R044-R011-R051-R007-R047-R024-R015-R053-R018-R019-R007-R019-R048-R019-R018-R032-R049-R038-R062-R022-R035                                                                                 | N003-N002-N004-N008-N004-N007-N004-N008-N009-N005-N004-N014-N015-N011                                                             |
| tr-007           | R007-R012-R019-R018-R019-R018-R019-R041-R019-R007-R031-R007-R008-R028-R026-R028-R037-R028-R037-R036-R038-R071-R022-R035                                                                  | N016-N017-N018-N042-N033-N004-N005-N004-N036-N004-N038-N037-N043-N011                                                             |
| tr-008           | R043-R014-R013-R054-R010-R013-R054-R029-R039-R025-R054-R007-R025-R054-R010-R013-R054-R027-R013-R054-R042                                                                                 | N027-N017-N004-N028-N029-N002-N030-N031-N011                                                                                      |
| tr-009           | R044-R011-R051-R007-R016-R007-R015-R008-R009-R022-R035                                                                                                                                   | N003-N002-N004-N005-N004-N006-N004-N002-N004-N005-N012-N006-N009-N033-N009-N005-N009-N010-N004-N014-N004-N011                     |
| tr-010           | R044-R011-R055-R007-R023-R056-R015-R053-R011-R019-R018-R019-R018-R022-R035                                                                                                               | N003-N002-N004-N005-N004-N006-N004-N002-N004-N005-N012-N006-N009-N014-N015-N011                                                   |
| tr-011           | R044-R011-R051-R007-R015-R019-R009-R022-R035                                                                                                                                             | N003-N008-N004-N005-N004-N006-N004-N008-N009-N005-N009-N010-N004-N005-N004-N011                                                   |
| tr-012           | R044-R007-R020-R007-R020-R021-R030-R007-R015-R008-R009-R022-R035                                                                                                                         | N003-N002-N004-N005-N012-N006-N019-N008-N004-N008-N009-N005-N009-N010-N004-N005-N004-N011                                         |
| tr-013           | R044-R007-R020-R007-R020-R021-R030-R007-R015-R008-R009-R022-R035                                                                                                                         | N003-N008-N004-N005-N004-N006-N004-N008-N004-N008-N004-N008-N009-N005-N009-N010-N004-N005-N004-N011                               |
| tr-014           | R044-R011-R051-R007-R023-R024-R052-R053-R004-R019-R018-R019-R018-R022                                                                                                                    | N003-N002-N004-N005-N012-N006-N019-N008-N004-N008-N009-N005-N009-N010-N004-N005-N004-N011                                         |
| tr-015           | R044-R007-R020-R007-R020-R021-R030-R007-R015-R008-R009-R022-R035                                                                                                                         | N003-N002-N004-N005-N012-N006-N019-N008-N004-N008-N004-N008-N009-N010-N004-N014-N015-N011                                         |
| tr-016           | R044-R007-R051-R021-R063-R004-R050-R007-R063-R004-R050-R033-R003-R019-R033-R003-R064-R033-R003-R064-R033-R003-R064-R007-R019-R065-R006-R033-R003-R066-R001-R032-R067-R068-R069-R034-R035 | N003-N008-N004-N020-N021-N011-N011                                                                                                |
| tr-017           | R007-R003-R019-R018-R070-R018-R019-R018-R008-R028-R026-R028-R026-R028-R038-R071-R022-R035                                                                                                | N016-N017-N018-N011                                                                                                               |

|        |                                                                                                                                                                                          |                                                                                                                         |
|--------|------------------------------------------------------------------------------------------------------------------------------------------------------------------------------------------|-------------------------------------------------------------------------------------------------------------------------|
| tr-018 | R044-R011-R051-R007-R023-R024-R052-R053-R004-R019-R018-R019-R018-R022-R035                                                                                                               | N003-N002-N004-N005-N004-N006-N004-N005-N004-N008-N009-N005-N004-N023-N041-N011                                         |
| tr-019 | R044-R011-R051-R028-R040-R018-R032-R007-R032-R028-R028-R038-R072-R062-R022-R035                                                                                                          | N003-N005-N004-N006-N004-N026-N026-N008-N022-N008-N009-N005-N004-N023-N004-N023-N024-N011                               |
| tr-020 | R044-R011-R051-R007-R023-R024-R052-R053-R004-R019-R018-R019-R018-R022-R035                                                                                                               | N003-N005-N004-N006-N004-N026-N008-N022-N008-N009-N005-N004-N023-N004-N023-N024-N011                                    |
| tr-021 | R044-R011-R051-R007-R015-R019-R009-R022-R035                                                                                                                                             | N003-N002-N004-N005-N004-N006-N004-N008-N004-N008-N004-N008-N004-N008-N004-N006-N004-N005-N009-N005-N004-N014-N015-N011 |
| tr-022 | R044-R011-R055-R007-R023-R056-R015-R053-R011-R019-R058-R019-R018-R022-R035                                                                                                               | N003-N002-N004-N005-N012-N006-N048-N049-N009-N005-N009-N005-N009-N010-N004-N008-N004-N011                               |
| tr-023 | R044-R007-R051-R021-R063-R004-R050-R007-R063-R004-R050-R033-R003-R019-R033-R003-R064-R033-R003-R064-R033-R003-R064-R007-R019-R065-R006-R033-R003-R066-R001-R032-R067-R068-R069-R034-R035 | N003-N008-N004-N020-N021-N011                                                                                           |
| tr-024 | R044-R011-R051-R004-R019-R018-R019-R018-R022-R035                                                                                                                                        | N003-N002-N004-N005-N012-N006-N004-N008-N004-N008-N004-N006-N004-N005-N009-N032-N004-N005-N004-N011                     |
| tr-025 | R044-R011-R051-R004-R019-R018-R019-R018-R022-R035                                                                                                                                        | N003-N002-N004-N005-N012-N006-N004-N006-N004-N008-N004-N008-N004-N006-N004-N005-N009-N032-N004-N005-N004-N011           |
| tr-026 | R044-R011-R051-R007-R016-R011-R073-R024-R015-R053-R011-R051-R004-R019-R074-R019-R048-R019-R018-R032-R049-R038-R062-R022-R035                                                             | N003-N002-N004-N005-N004-N006-N004-N002-N004-N005-N012-N006-N009-N033-N009-N039-N009-N010-N004-N014-N004-N011           |
| tr-027 | R044-R011-R051-R028-R040-R018-R032-R007-R032-R028-R028-R038-R072-R062-R022-R035                                                                                                          | N003-N002-N004-N005-N004-N006-N009-N026-N008-N022-N008-N009-N005-N004-N023-N004-N023-N024-N011                          |
| tr-028 | R044-R011-R051-R007-R023-R024-R019-R048-R019-R018-R075-R049-R038-R062-R022-R035                                                                                                          | N003-N008-N004-N005-N004-N006-N004-N008-N004-N008-N009-N005-N009-N005-N009-N010-N004-N014-N004-N011                     |
| tr-029 | R044-R007-R020-R007-R020-R021-R030-R007-R015-R008-R009-R022-R035                                                                                                                         | N003-N008-N004-N005-N004-N008-N004-N008-N009-N005-N009-N005-N009-N010-N004-N014-N004-N011                               |
| tr-030 | R044-R011-R051-R028-R040-R018-R032-R007-R076-R028-R038-R062-R022-R035                                                                                                                    | N003-N008-N004-N006-N004-N026-N008-N022-N008-N009-N005-N004-N023-N004-N023-N024-N011                                    |
| tr-031 | R044-R011-R051-R007-R016-R011-R055-R007-R016-R011-R051-R007-R045-R011-R055-R007-R023-R007-R015-R053-R051-R004-R019-R018-R019-R060-R019-R018-R032-R061-R038-R062-R022-R035                | N003-N002-N004-N005-N012-N006-N019-N008-N004-N014-N015-N011                                                             |
| tr-032 | R044-R011-R051-R059-R023-R024-R052-R053-R004-R019-R018-R019-R018-R022-R035                                                                                                               | N003-N002-N004-N005-N004-N006-N004-N046-N004-N014-N045-N011                                                             |
| tr-033 | R043-R014-R013-R054-R010-R013-R054-R029-R039-R025-R035                                                                                                                                   | N027-N017-N004-N028-N029-N002-N030-N031-N011                                                                            |
| tr-034 | R044-R011-R051-R028-R040-R018-R032-R007-R032-R028-R028-R038-R072-R062-R022-R035                                                                                                          | N003-N002-N004-N006-N004-N006-N004-N026-N008-N022-N008-N009-N005-N004-N023-N004-N023-(N004)-N011                        |
| tr-035 | R044-R011-R051-R028-R040-R018-R032-R007-R032-R007-R032-R028-R038-R072-R062-R022-R035                                                                                                     | N025-N002-N004-N005-N004-N006-N009-N026-N008-N022-N008-N009-N005-N004-N023-N004-N023-N024-N011                          |

|        |                                                                                                          |                                                                                                                                   |
|--------|----------------------------------------------------------------------------------------------------------|-----------------------------------------------------------------------------------------------------------------------------------|
| tr-036 | R044-R011-R051-R028-R040-R018-R032-R028-R028-R028-R038-R062-R022-R035                                    | N003-N002-N004-N005-N004-N006-N022-N008-N009-N026-N023-N004-N023-N024-N011                                                        |
| tr-037 | R044-R011-R051-R028-R040-R018-R032-R007-R032-R007-R032-R028-R028-R038-R062-R022-R035                     | N003-N002-N004-N005-N004-N044-N004-N006-N022-N005-N004-N023-N004-N023-N004-N023-N024-N011                                         |
| tr-038 | R044-R011-R051-R028-R040-R018-R032-R007-R032-R007-R032-R028-R038-R062-R022-R035                          | N003-N002-N004-N005-N004-N044-N004-N006-N022-N005-N004-N023-N004-N023-N004-N023-N024-N011                                         |
| tr-039 | R044-R011-R055-R007-R023-R056-R015-R053-R011-R019-R018-R019-R018-R022-R035                               | N003-N002-N004-N005-N012-N013-N013-N006-N004-N006-N004-N008-N004-N008-N004-N008-N004-N006-N004-N005-N009-N005-N004-N014-N015-N011 |
| tr-040 | R044-R011-R051-R002-R040-R018-R032-R007-R032-R028-R005-R028-R036-R038-R062-R022-R035                     | N003-N005-N004-N006-N004-N005-N022-N008-N009-N005-N004-N023-N004-N023-N024-N011                                                   |
| tr-041 | R044-R011-R051-R028-R040-R018-R032-R007-R032-R028-R038-R072-R062-R022-R035                               | N003-N005-N004-N006-N022-N008-N009-N005-N004-N023-N004-N023-N024-N011                                                             |
| tr-042 | R044-R007-R020-R007-R015-R008-R009-R022-R035                                                             | N003-N008-N004-N005-N004-N006-N004-N008-N009-N005-N009-N010-N004-N005-N004-N011                                                   |
| tr-043 | R044-R011-R051-R007-R015-R019-R009-R022-R035                                                             | N003-N002-N004-N005-N004-N006-N004-N002-N004-N008-N009-N005-N004-N008-N009-N005-N004-N014-N015-N011                               |
| tr-044 | R044-R011-R051-R007-R023-R021-R030-R017-R015-R008-R009-R022-R035                                         | N003-N008-N004-N005-N004-N011                                                                                                     |
| tr-045 | R044-R007-R020-R007-R020-R021-R030-R007-R015-R008-R009-R022-R035                                         | N003-N002-N004-N005-N004-N006-N004-N006-N004-N007-N004-N008-N009-N010-N004-N005-N004-N011                                         |
| tr-046 | R044-R011-R051-R007-R023-R024-R052-R053-R004-R019-R018-R019-R018-R022-R035                               | N003-N002-N004-N005-N004-N006-N004-N002-N004-N008-N009-N005-N004-N008-N009-N005-N004-N014-N015-N011                               |
| tr-047 | R044-R011-R051-R007-R023-R024-R015-R053-R004-R019-R018-R019-R048-R019-R018-R032-R049-R038-R062-R022-R035 | N003-N002-N004-N005-N004-N006-N004-N002-N004-N005-N012-N006-N009-N005-N009-N005-N009-N010-N004-N014-N004-N011                     |
| tr-048 | R044-R011-R051-R007-R020-R021-R030-R007-R015-R008-R009-R022-R035                                         | N003-N002-N004-N005-N004-N006-N004-N002-N004-N005-N012-N006-N009-N033-N009-N005-N009-N010-N034-N014-N024-N011                     |
| tr-049 | R044-R007-R020-R007-R020-R021-R030-R007-R015-R008-R009-R022-R035                                         | N050-N002-N004-N008-N004-N051-N009-N051-N004-N006-N004-N008-N004-N046-N034-N014-N024-N011                                         |
| tr-050 | R044-R007-R020-R007-R020-R021-R030-R007-R015-R008-R009-R022-R035                                         | N003-N040-N004-N005-N004-N008-N004-N008-N009-N005-N009-N005-N009-N010-N004-N014-N004-N011                                         |
| tr-051 | R044-R007-R020-R021-R030-R007-R015-R008-R009-R022-R035                                                   | N003-N008-N004-N005-N004-N006-N009-N008-N009-N005-N009-N010-N004-N005-N004-N011                                                   |
| tr-052 | R044-R007-R020-R021-R030-R007-R015-R008-R009-R022-R035                                                   | N003-N008-N004-N005-N004-N006-N004-N008-N009-N005-N009-N010-N004-N005-N004-N011                                                   |
| tr-053 | R044-R007-R015-R008-R009-R022-R035                                                                       | N003-N002-N004-N005-N004-N006-N004-N002-N004-N008-N009-N005-N004-N008-N009-N005-N004-N014-N015-N011                               |
| tr-054 | R044-R007-R020-R021-R030-R007-R015-R008-R009-R022-R035                                                   | N003-N008-N004-N007-N004-N008-N009-N010-N004-N014-N004-N011                                                                       |
| tr-055 | R044-R007-R020-R007-R020-R007-R015-R008-R009-R022-R035                                                   | N003-N002-N004-N005-N004-N006-N004-N002-N003-N008-N009-N005-N004-                                                                 |

|        |                                                                                                                                                                                          |                                                                                                     |
|--------|------------------------------------------------------------------------------------------------------------------------------------------------------------------------------------------|-----------------------------------------------------------------------------------------------------|
|        |                                                                                                                                                                                          | N008-N009-N005-N004-N014-N015-N011                                                                  |
| tr-056 | R044-R011-R051-R007-R020-R021-R030-R007-R015-R008-R009-R022-R035                                                                                                                         | N003-N002-N004-N005-N012-N006-N004-N006-N004-N008-N004-N008-N009-N006-N004-N006-N004-N008-N004-N011 |
| tr-057 | R044-R007-R020-R007-R020-R007-R015-R008-R009-R022-R035                                                                                                                                   | N003-N002-N004-N005-N004-N006-N004-N002-N004-N008-N009-N005-N004-N008-N009-N005-N004-N014-N015-N011 |
| tr-058 | R044-R011-R051-R007-R015-R019-R009-R022-R035                                                                                                                                             | N003-N002-N004-N008-N004-N006-N004-N006-N004-N007-N004-N008-N009-N005-N004-N014-N015-N011           |
| tr-059 | R044-R011-R051-R007-R015-R019-R046-R022-R035                                                                                                                                             | N003-N002-N004-N008-N004-N006-N004-N006-N004-N007-N004-N008-N009-N005-N004-N014-N015-N011           |
| tr-060 | R007-R003-R008-R028-R026-R028-R008-R007-R008-R028-R026-R028-R026-R028-R038-R071-R022-R035                                                                                                | N016-N017-N018-N035-N004-N005-N004-N005-N004-N036-N004-(N002)-N038-N037-N018-N011                   |
| tr-061 | R044-R007-R020-R007-R020-R021-R030-R007-R015-R008-R009-R022-R035                                                                                                                         | N003-N002-N004-N005-N012-N006-N019-N008-N004-N008-N009-N005-N009-N010-N004-N014-N045-N011           |
| tr-062 | R057-R011-R051-R007-R023-R024-R015-R053-R004-R019-R018-R019-R018-R022-R035                                                                                                               | N003-N002-N004-N005-N012-N006-N019-N008-N004-N008-N009-N005-N009-N010-N004-N005-N004-N011           |
| tr-063 | R043-R014-R013-R054-R010-R013-R054-R042-R029-R039-R025-R054-R010-R013-R054-R042-R029-R039-R025-R035                                                                                      | N027-N017-N004-N028-N029-N002-N030-N031-N011                                                        |
| tr-064 | R044-R011-R051-R007-R023-R024-R052-R053-R004-R019-R018-R019-R018-R022-R035                                                                                                               | N047-N017-N018-N011                                                                                 |
| tr-065 | R044-R011-R051-R007-R023-R024-R052-R053-R004-R019-R018-R019-R018-R022-R035                                                                                                               | N003-N002-N004-N005-N012-N006-N019-N008-N004-N008-N009-N005-N009-N010-N004-N005-N004-N011           |
| tr-066 | R043-R014-R013-R054-R010-R013-R054-R042-R039-R025-R054-R042-R010-R013-R054-R042-R042-R039-R025-R035                                                                                      | N027-N017-N004-N028-N029-N002-N030-N031-N011                                                        |
| tr-067 | R043-R014-R013-R054-R042-R029-R039-R025-R054-R027-R013-R054-R042-R010-R013-R054-R027-R013-R035                                                                                           | N027-N017-N004-N028-N029-N002-N030-N031-N011                                                        |
| tr-068 | R044-R011-R055-R007-R023-R056-R015-R053-R011-R019-R018-R019-R018-R022-R035                                                                                                               | N003-N008-N009-N005-N009-N005-N004-N008-N004-N008-N009-N006-N009-N005-N004-N014-N015-N011           |
| tr-069 | R044-R007-R051-R021-R063-R004-R050-R007-R063-R004-R050-R033-R003-R019-R033-R003-R064-R007-R003-R064-R033-R003-R064-R007-R019-R065-R006-R033-R003-R066-R001-R032-R067-R068-R069-R034-R035 | N003-N008-N004-N020-N021-N011-N011                                                                  |
| tr-070 | R043-R014-R013-R054-R010-R013-R054-R042-R029-R039-R025-R054-R007-R025-R054-R042-R010-R013-R054-R027-R013-R035                                                                            | N027-N017-N004-N028-N029-N002-N030-N031-N011                                                        |
| tr-071 | R044-R007-R020-R007-R020-R021-R030-R007-R015-R008-R009-R022-R035                                                                                                                         | N003-N002-N004-N005-N012-N006-N019-N008-N004-N014-N015-N011                                         |
| tr-072 | R044-R011-R051-R007-R023-R024-R052-R053-R004-R019-R018-R019-R018-R022-R035                                                                                                               | N003-N002-N004-N005-N004-N006-N004-N007-N004-N008-N009-N010-N004-N005-N004-N011                     |
